# Supplementary material for: Synthesis and Crystallographic Characterisation of Pyridyl- and Indoleninyl-Substituted Pyrimido[1,2-b]Indazoles
Source: MDPI journal article supplement (doi:10.3390/cryst12091283), 2022-09-09
Supplement: s1 [file s1]

# Synthesis and Crystallographic Characterisation of Pyridyl- and Indoleninyl-Substituted Pyrimido[1,2-b]Indazoles

Abdul Qaiyum Ramle <sup>1,\*</sup>, Sang Loon Tan <sup>2,\*</sup> and Edward R. T. Tiekink <sup>2,\*</sup>

<sup>1</sup> School of Chemical Sciences, Universiti Sains Malaysia (USM), Penang 11800, Malaysia

<sup>2</sup> Research Centre for Crystalline Materials, School of Medical and Life Sciences, Sunway University, Bandar Sunway 47500, Malaysia

\* Correspondence: qaiyum@usm.my (A.Q.R.); alant@sunway.edu.my (S.L.T.); edwardt@sunway.edu.my (E.R.T.T.); Tel.: +60-3-7491-7181(E.R.T.T.)

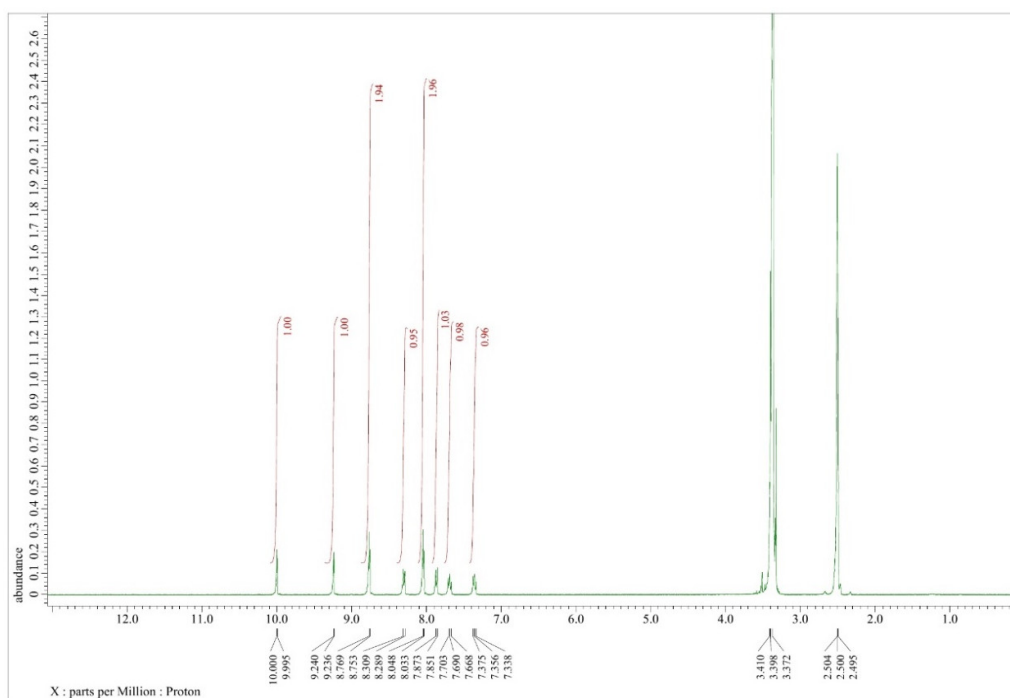

**Figure S1.** <sup>1</sup>H NMR (400 MHz, DMSO-*d*<sub>6</sub>) spectrum of **1a**.

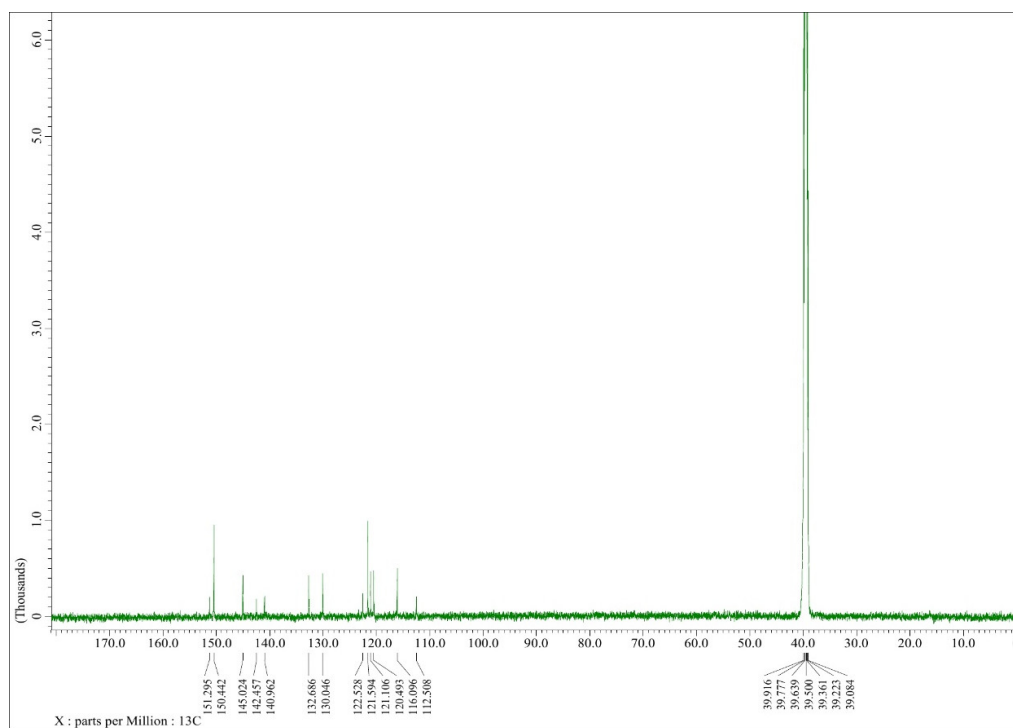

**Figure S2.** <sup>13</sup>C NMR (150 MHz, DMSO-*d*<sub>6</sub>) spectrum of **1a**.

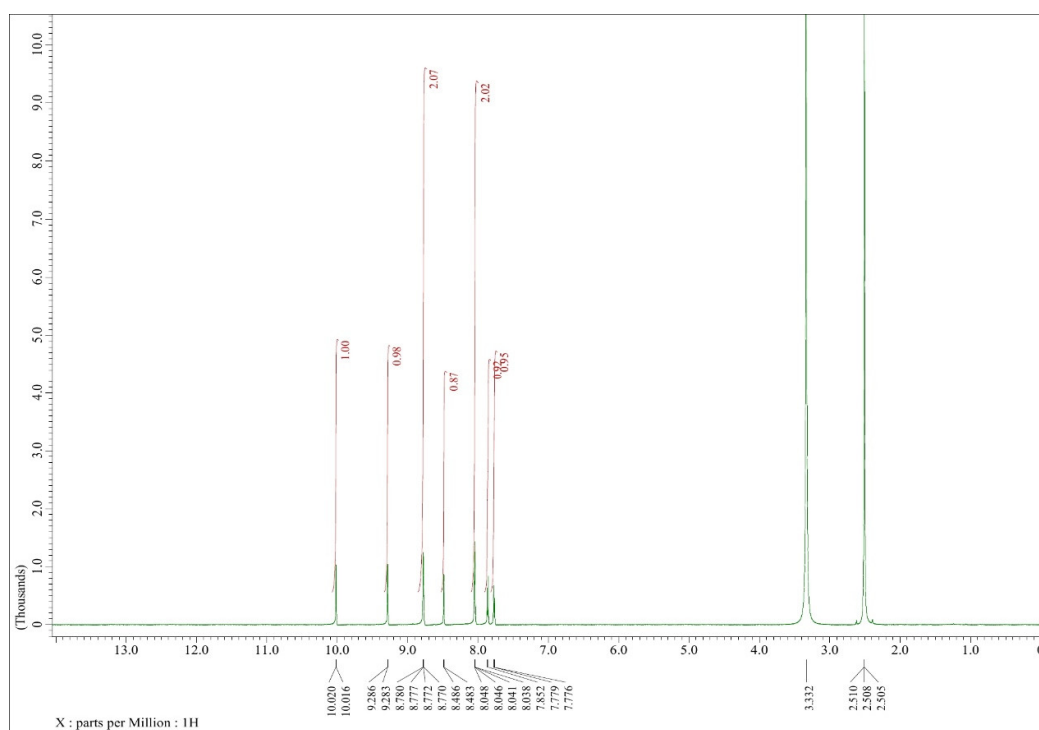

**Figure S3.** <sup>1</sup>H NMR (600 MHz, DMSO-*d*<sub>6</sub>) spectrum of **1b**.

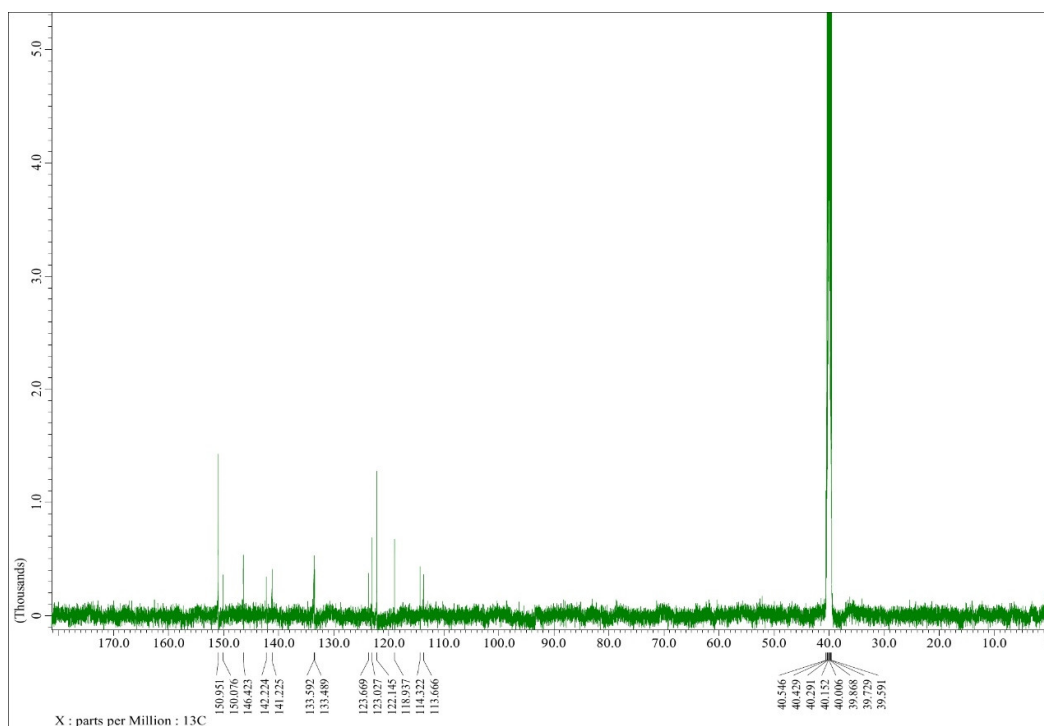

**Figure S4.** <sup>13</sup>C NMR (150 MHz, DMSO-*d*<sub>6</sub>) spectrum of **1b**.

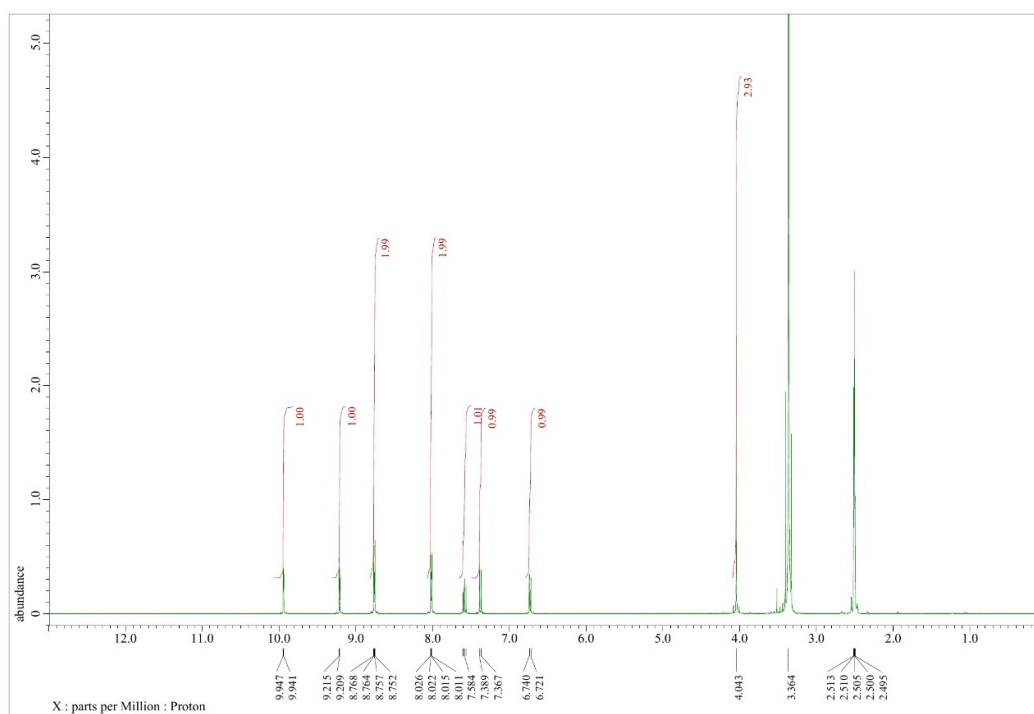

**Figure S5.** <sup>1</sup>H NMR (400 MHz, DMSO-*d*<sub>6</sub>) spectrum of **1c**.

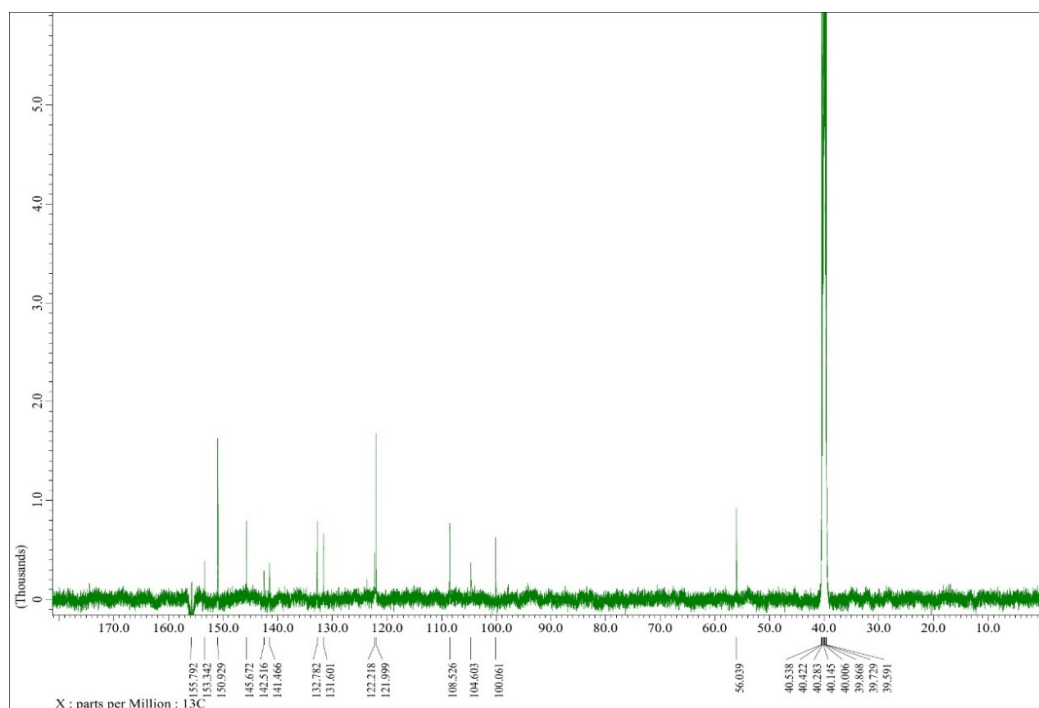

**Figure S6.**  $^{13}\text{C}$  NMR (150 MHz,  $\text{DMSO}-d_6$ ) spectrum of **1c**.

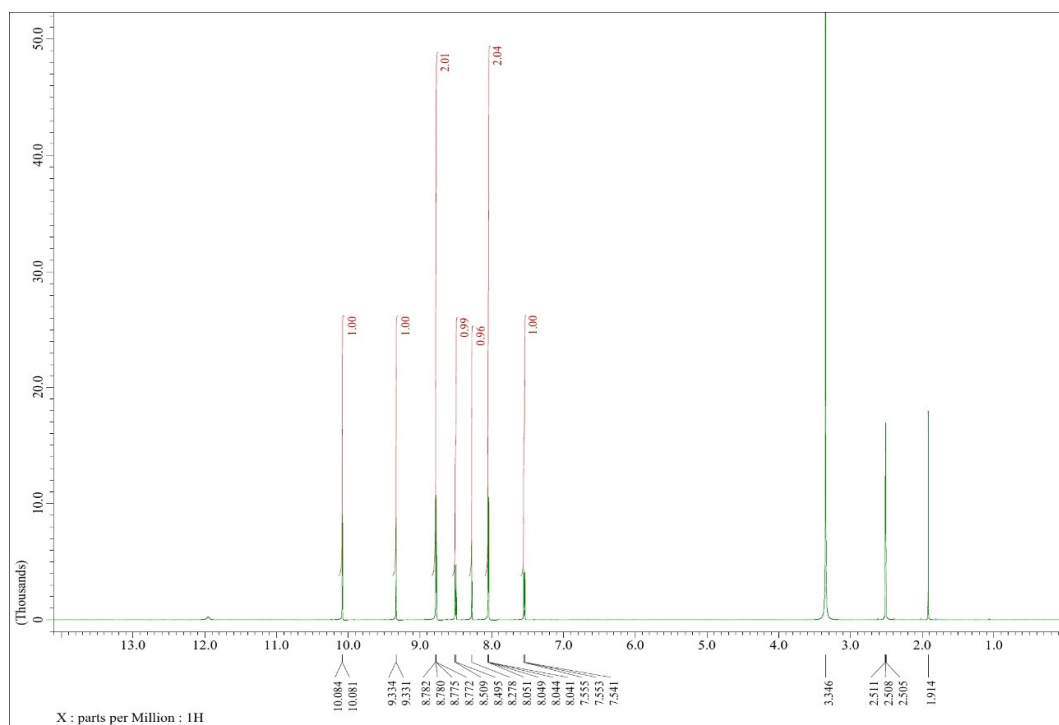

**Figure S7.**  $^1\text{H}$  NMR (600 MHz,  $\text{DMSO}-d_6$ ) spectrum of **1d**.

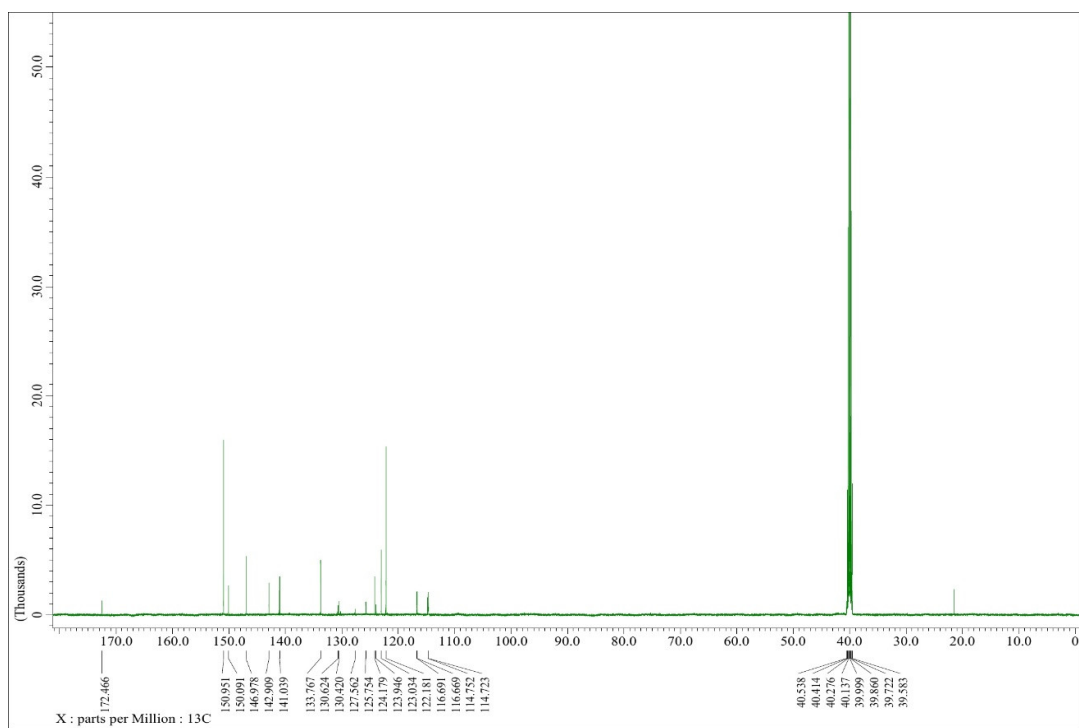

**Figure S8.**  $^{13}\text{C}$  NMR (150 MHz,  $\text{DMSO-}d_6$ ) spectrum of **1d**.

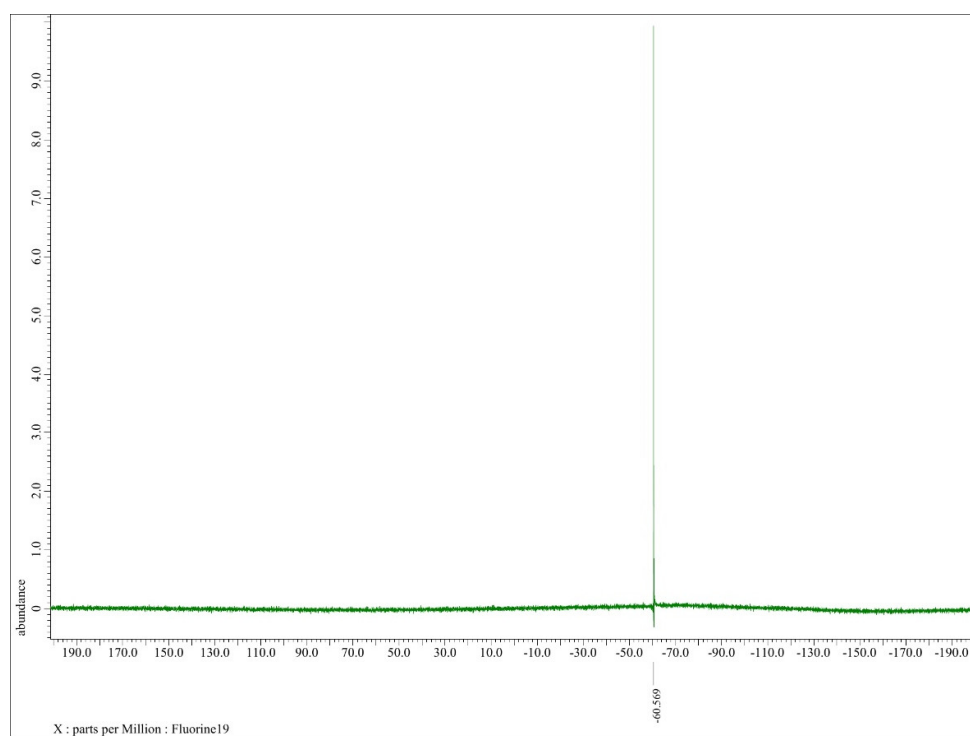

**Figure S9.**  $^{19}\text{F}$  NMR (376 MHz,  $\text{DMSO-}d_6$ ) of **1d**.

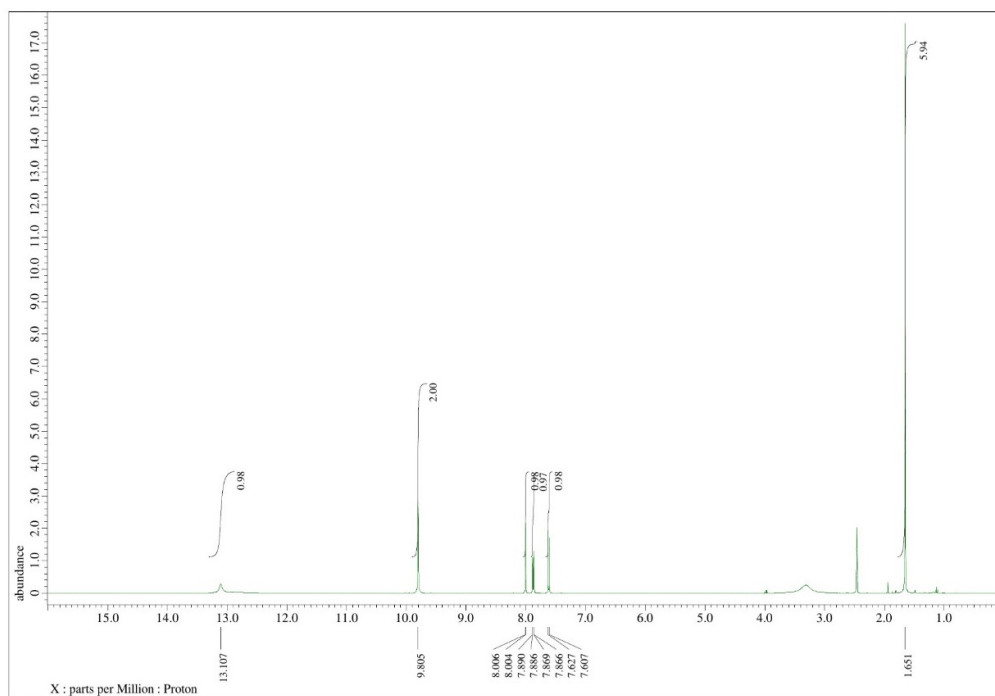

**Figure S10.** <sup>1</sup>H NMR (400 MHz, DMSO-*d*<sub>6</sub>) of 3.

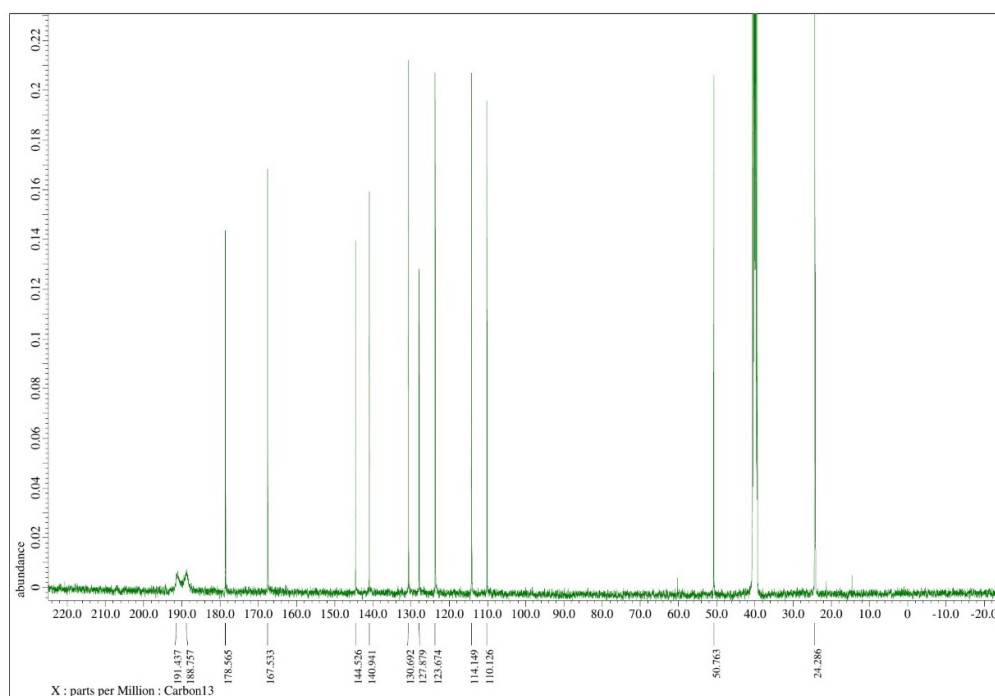

**Figure S11.** <sup>13</sup>C NMR (100 MHz, DMSO-*d*<sub>6</sub>) spectrum of 3.

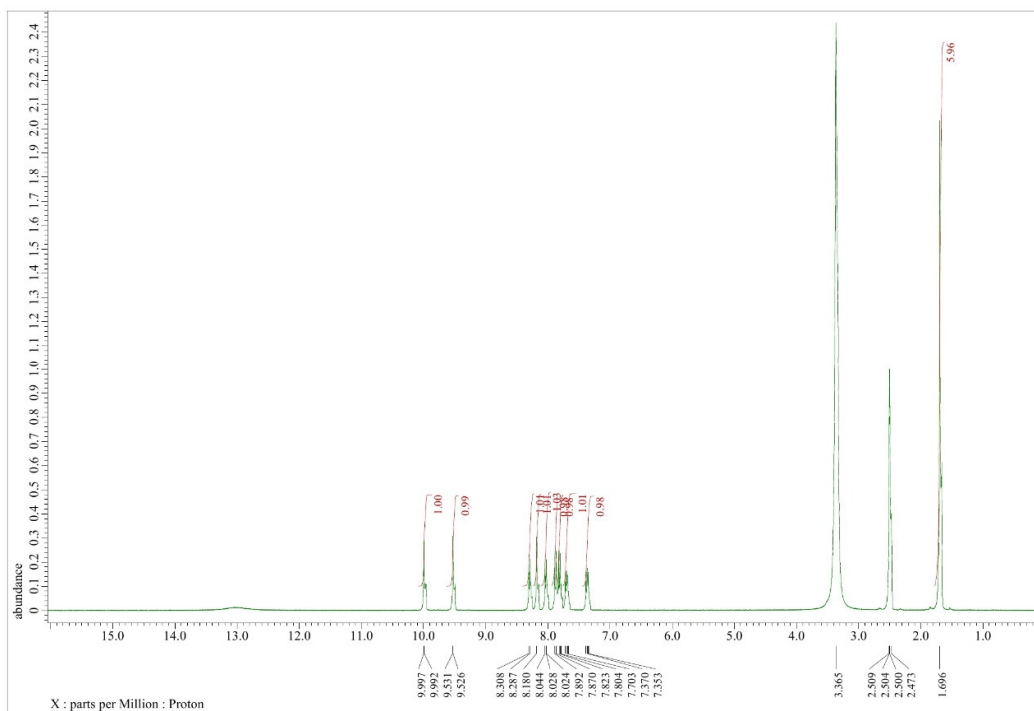

**Figure S12.**  $^1\text{H}$  NMR (400 MHz,  $\text{DMSO-}d_6$ ) spectrum of **4a**.

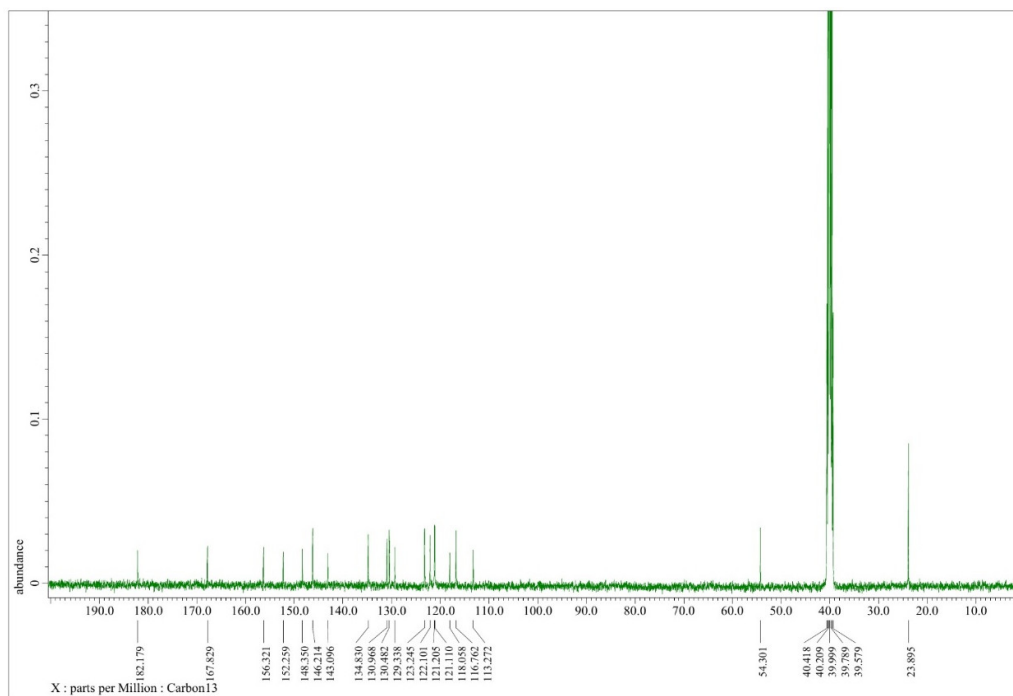

**Figure S13.**  $^{13}\text{C}$  NMR (100 MHz,  $\text{DMSO-}d_6$ ) spectrum of **4a**.

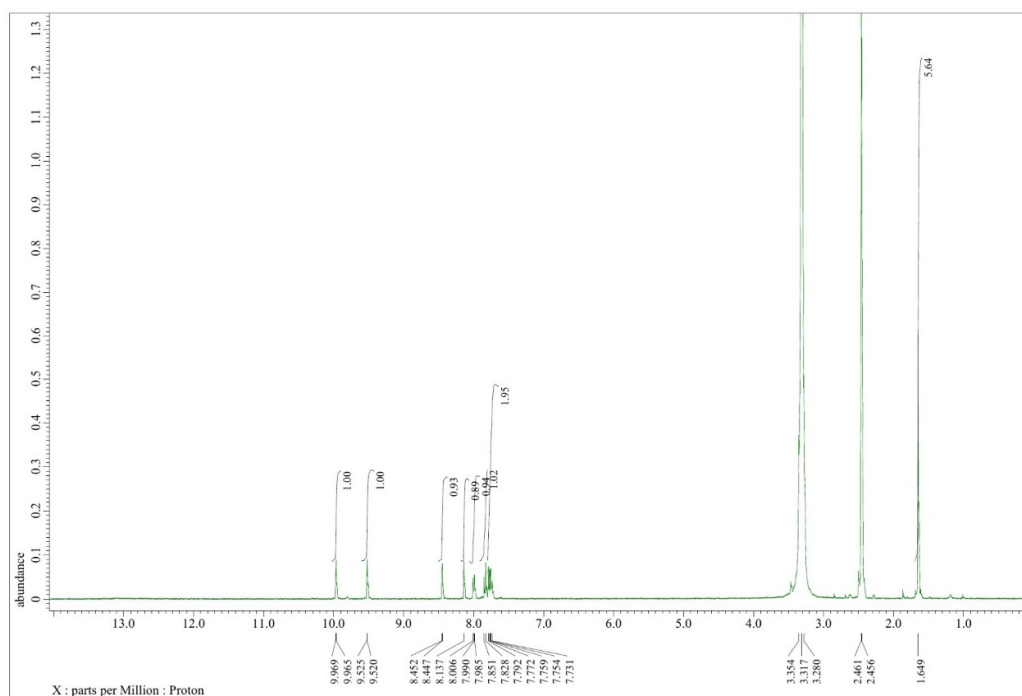

**Figure S14.**  $^1\text{H}$  NMR (400 MHz,  $\text{DMSO}-d_6$ ) spectrum of **4b**.

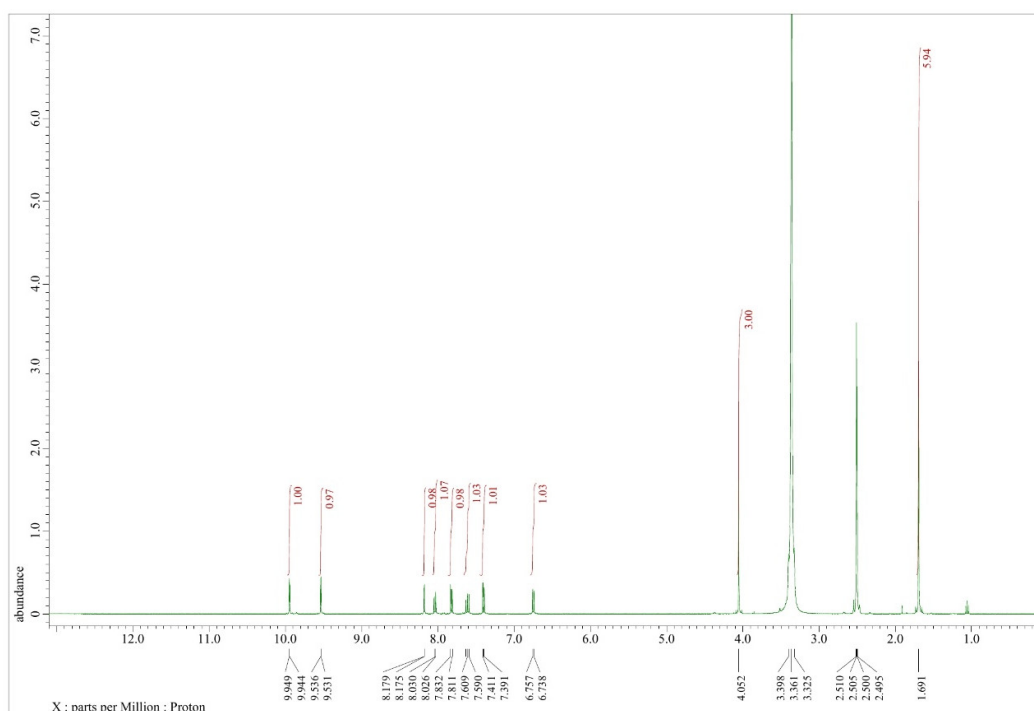

**Figure S15.**  $^1\text{H}$  NMR (400 MHz,  $\text{DMSO}-d_6$ ) spectrum of **4c**.



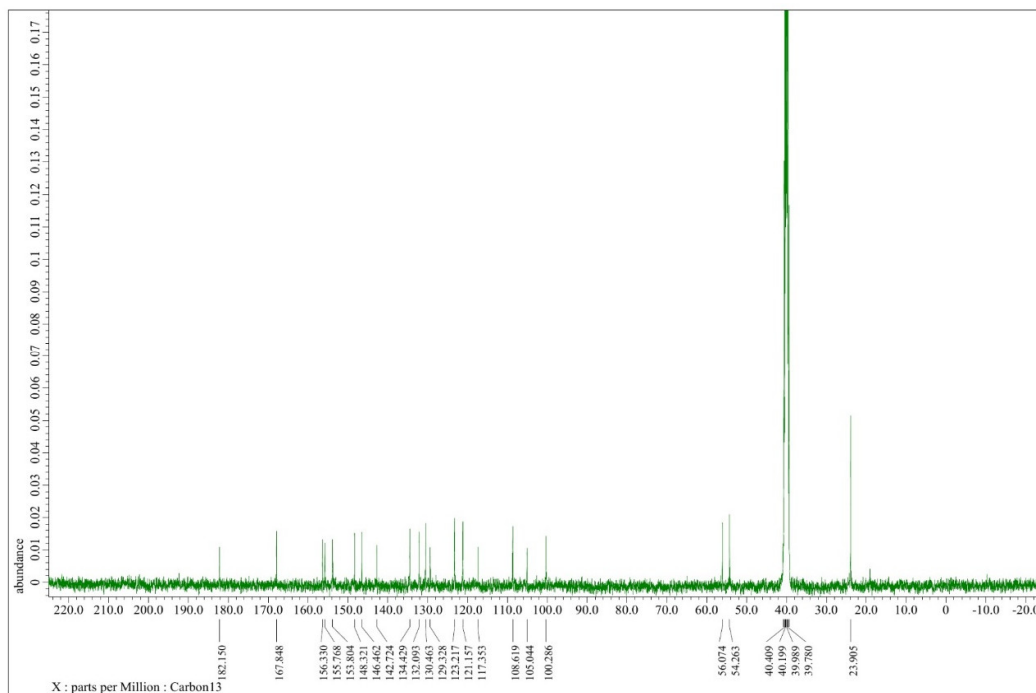

**Figure S16.** <sup>13</sup>C NMR (100 MHz, DMSO-*d*<sub>6</sub>) spectrum of 4c.

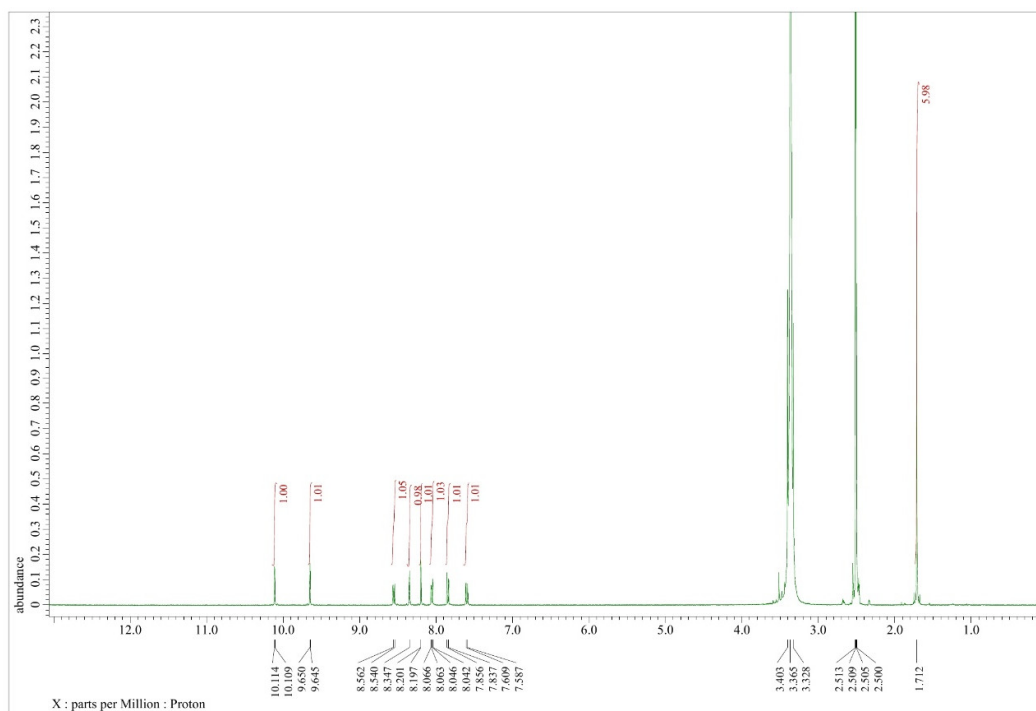

**Figure S17.** <sup>1</sup>H NMR (400 MHz, DMSO-*d*<sub>6</sub>) spectrum of 4d.

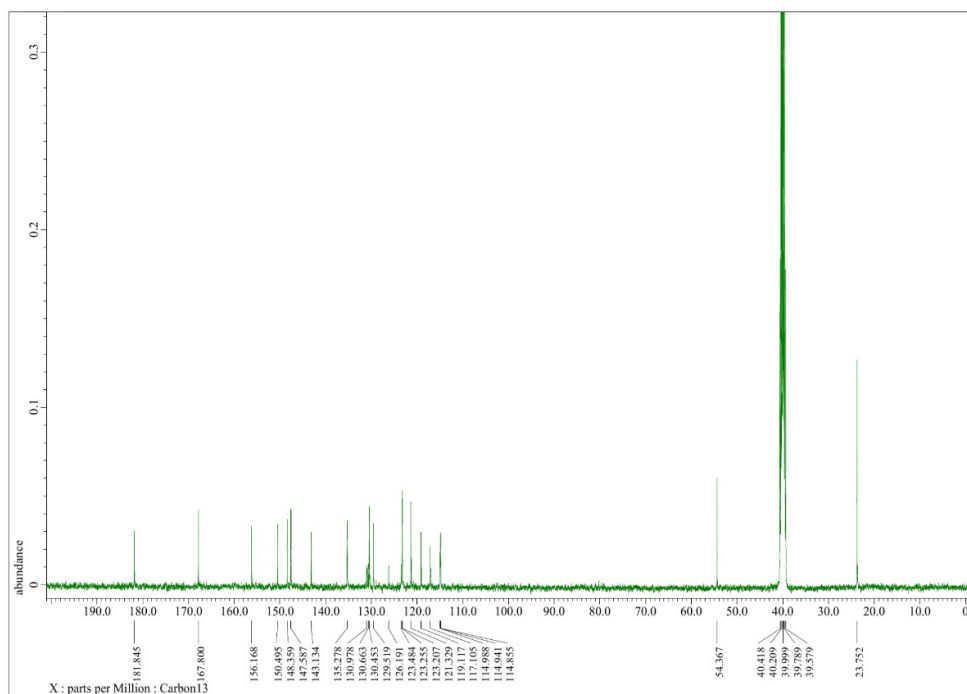

**Figure S18.** <sup>13</sup>C NMR (100 MHz, DMSO-*d*<sub>6</sub>) spectrum of 4d.

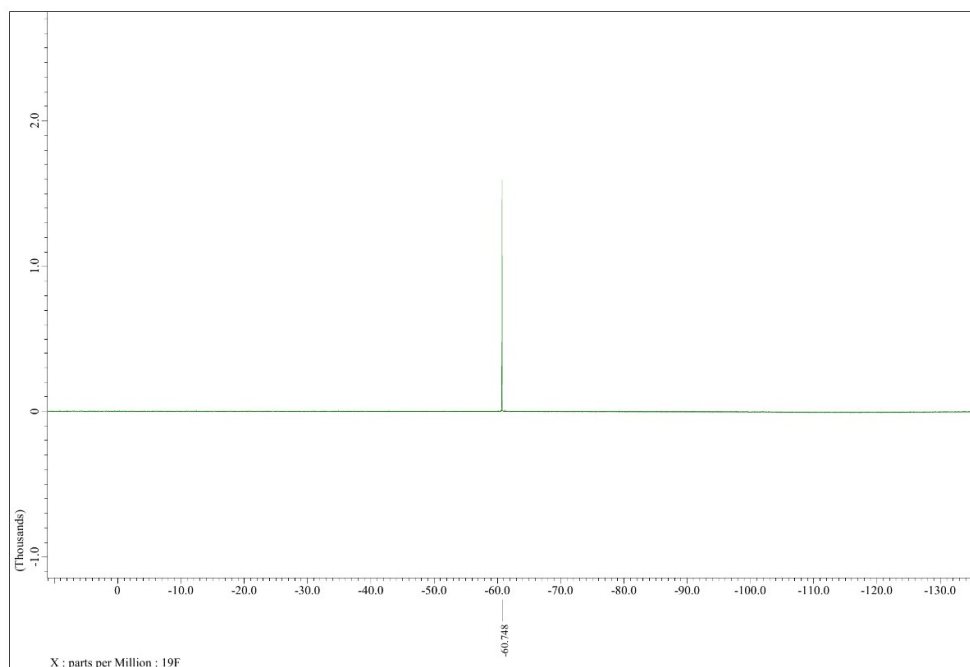

**Figure S19.** <sup>19</sup>F NMR (376 MHz, DMSO-*d*<sub>6</sub>) spectrum of 4d.
